# Supplementary figures and images for: PRIM2 Promotes Cell Cycle and Tumor Progression in p53-Mutant Lung Cancer
Source: MDPI journal article supplement (doi:10.3390/cancers14143370), 2022-07-11

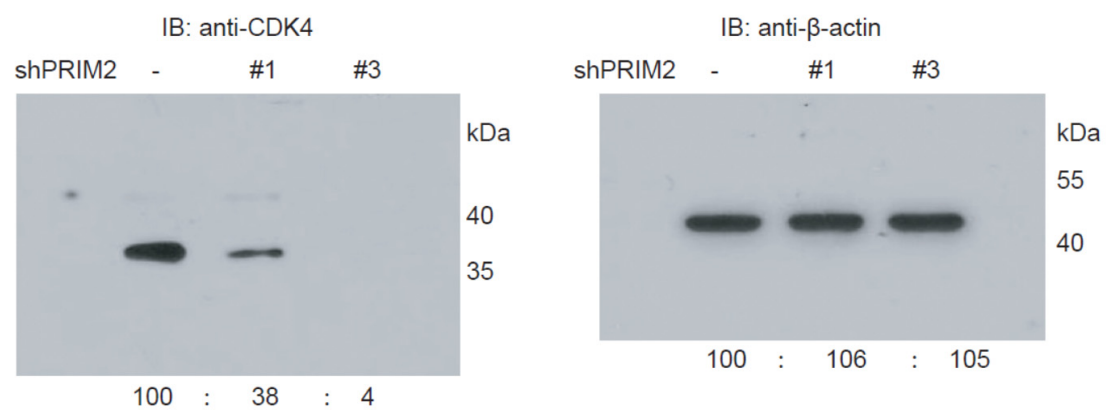

Figure S1: The uncropped WB figures is for figure 2B.

Supplement: s1 [file s1]
